# Supplementary material
Source: PubMed Central journal article supplement (PMC3025815)

# Supplementary Figure 1

## Ad-DsRed-SP

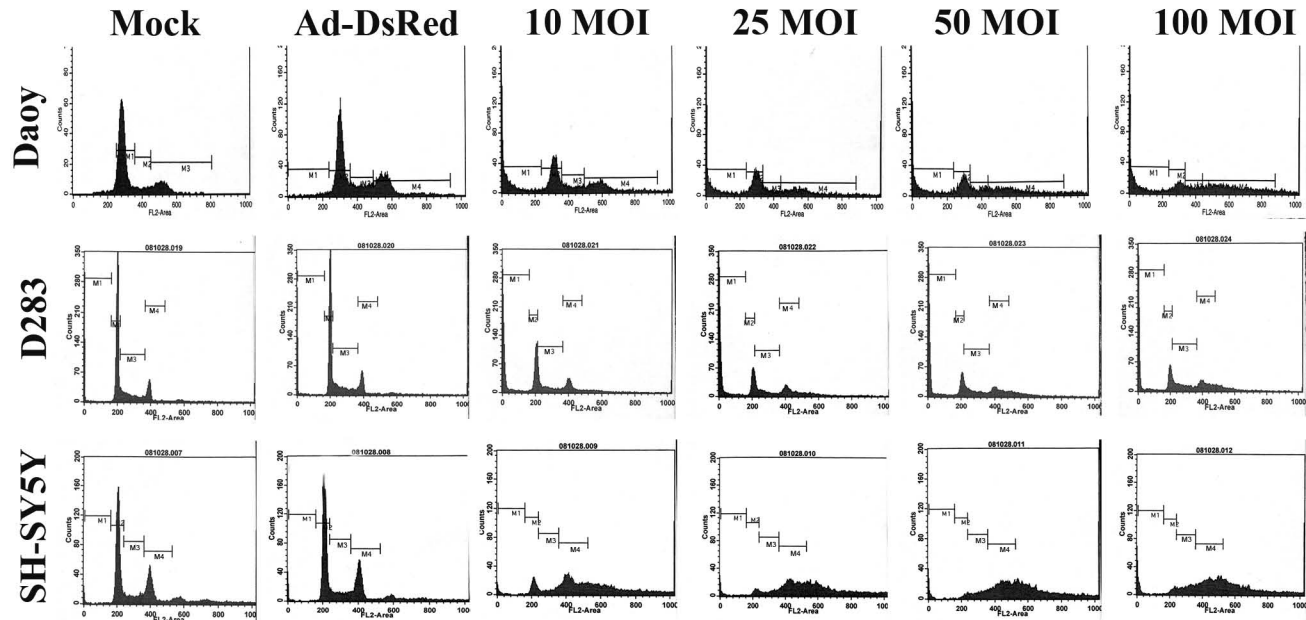

# Supplementary Figure 2

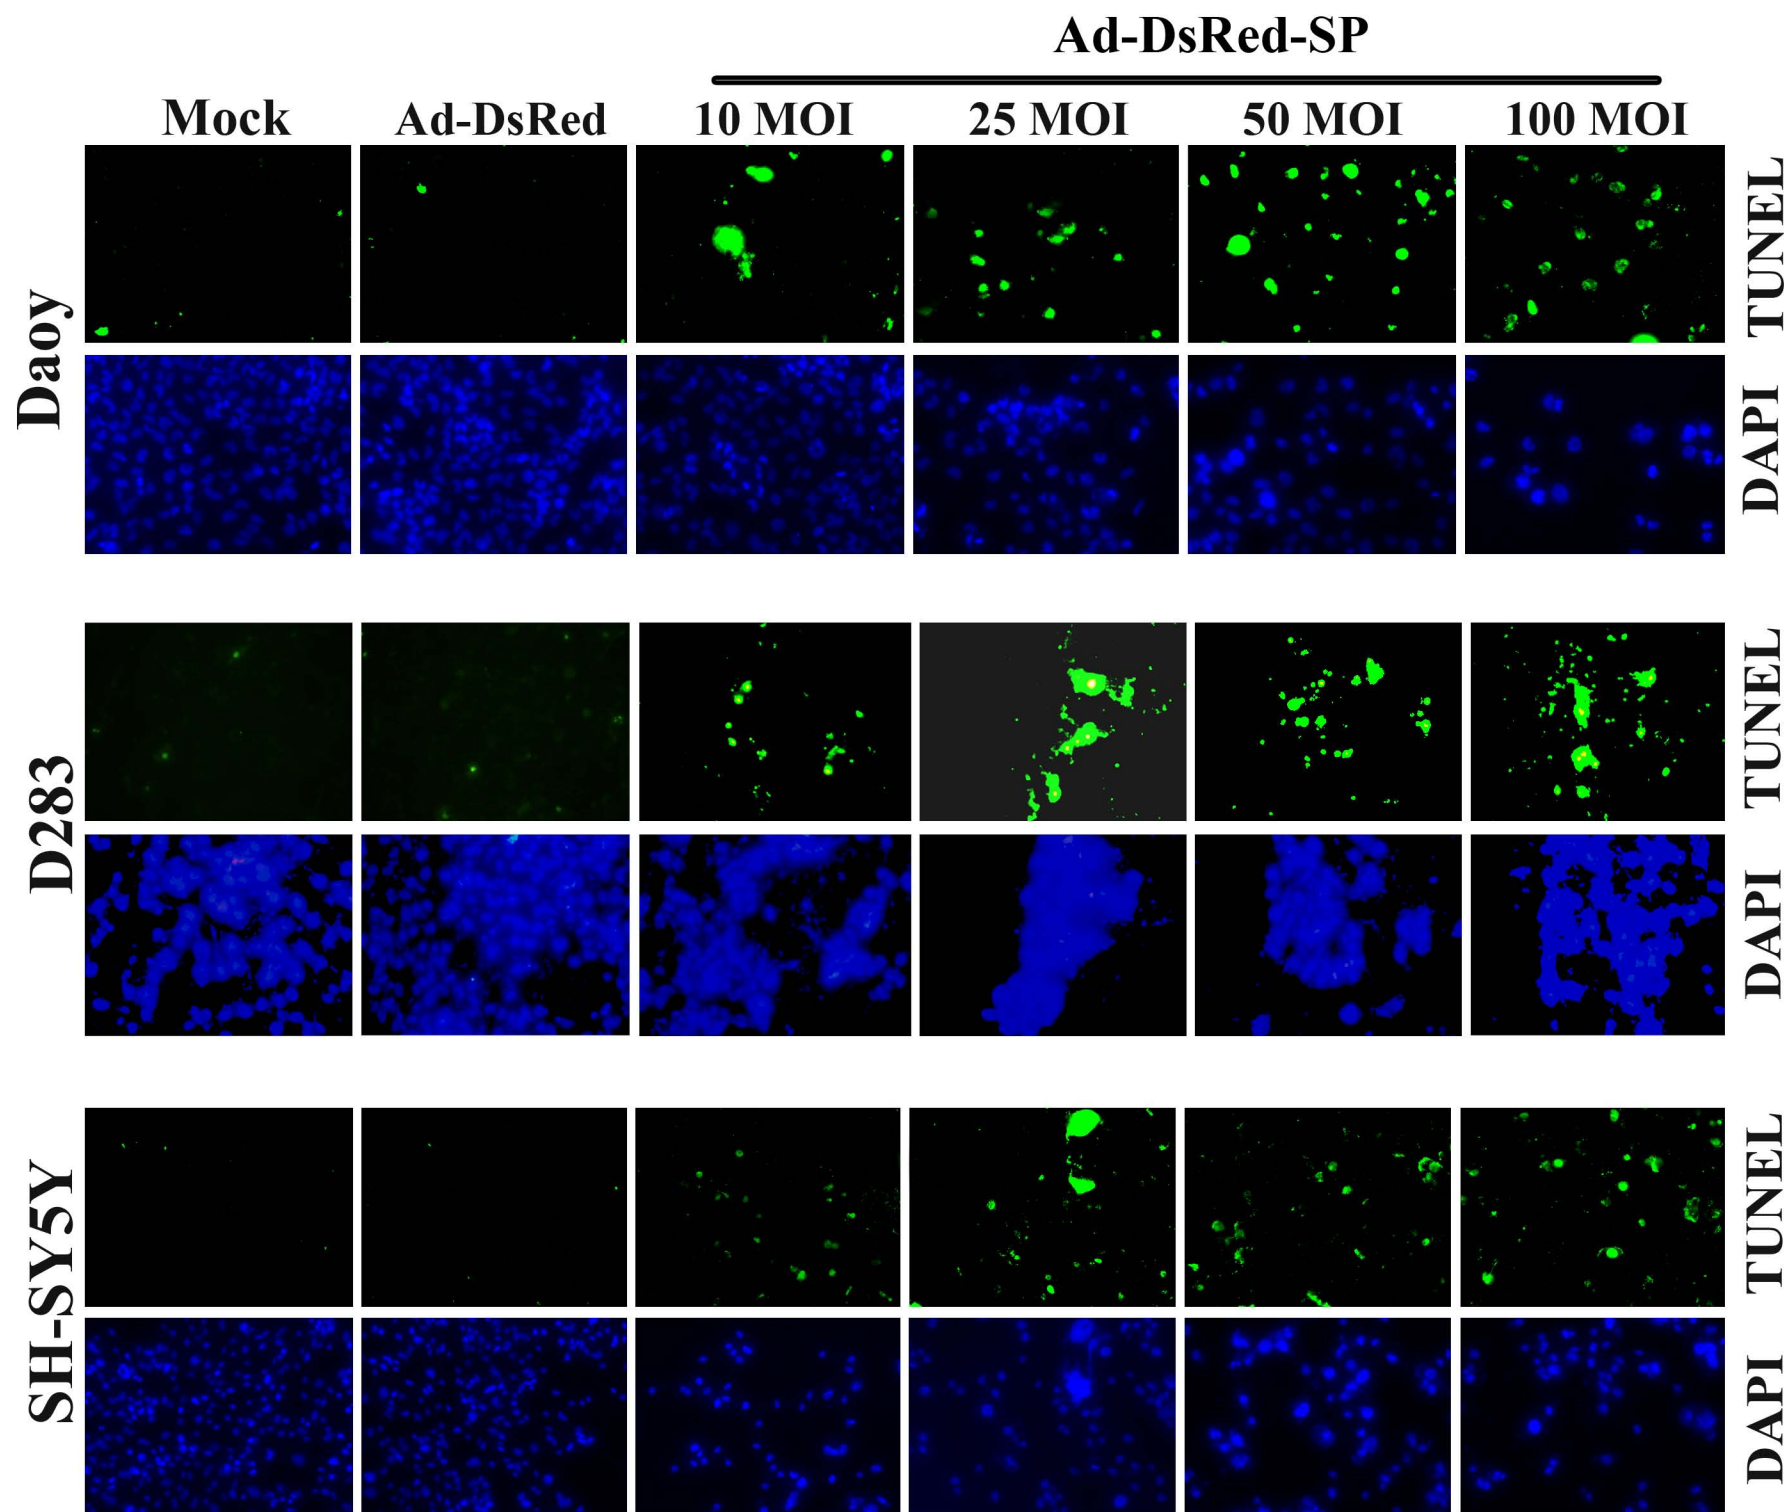

# Supplementary Figure 3

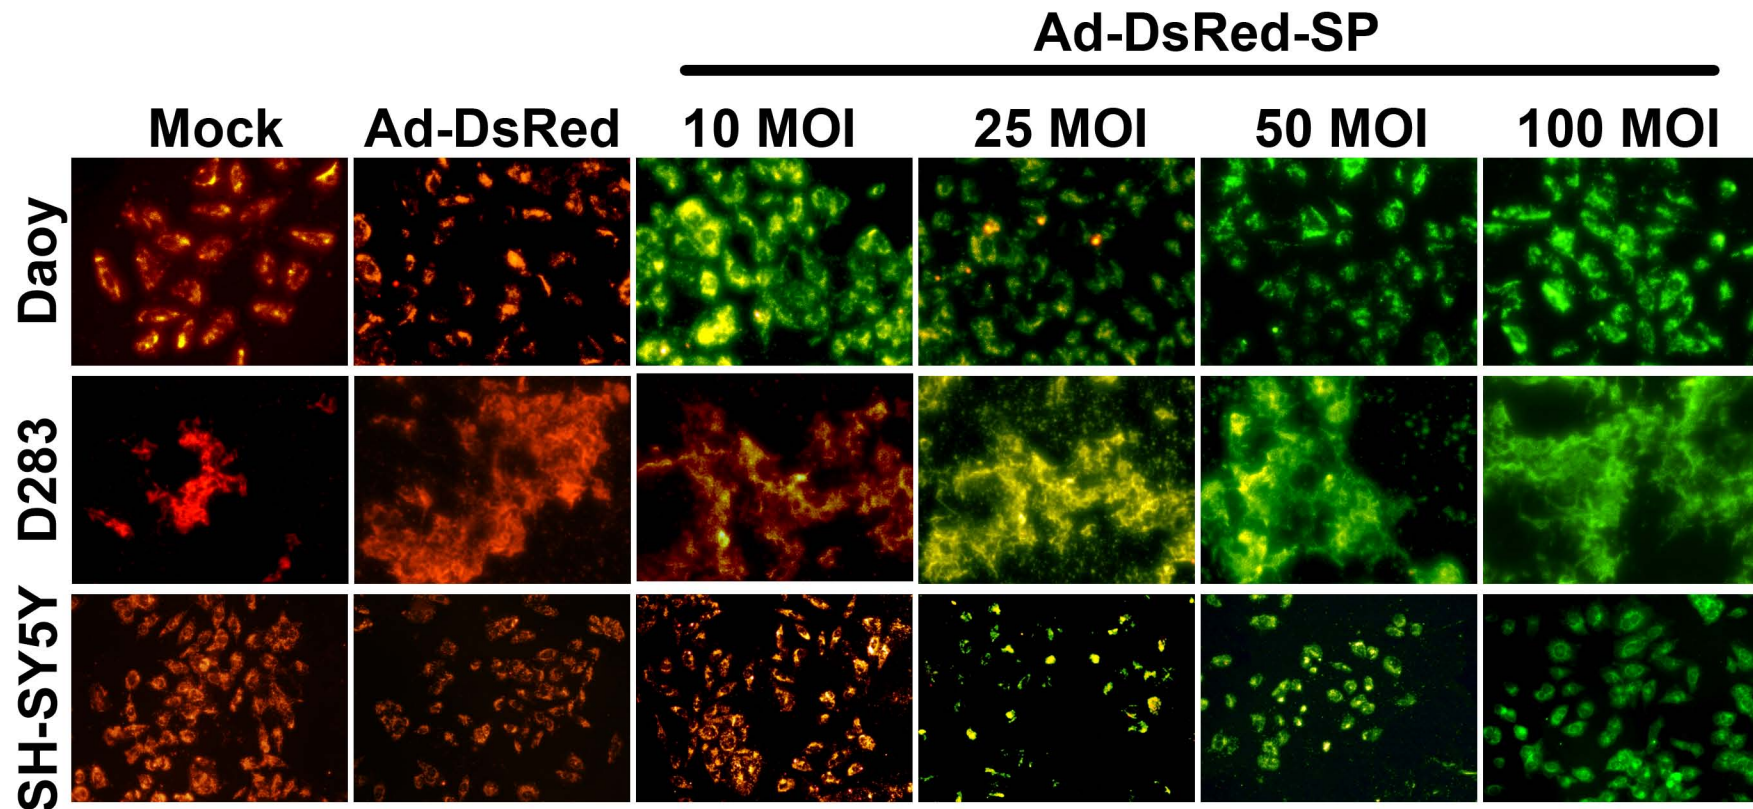

# Supplementary Figure 4

**Mock**

**Ad-DsRed-SP**

---

**Daoy**

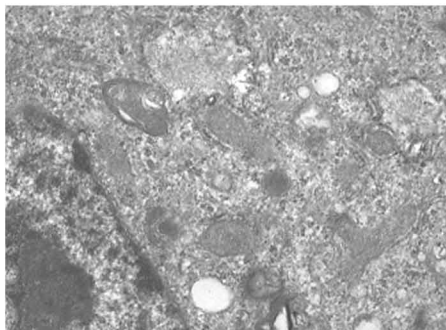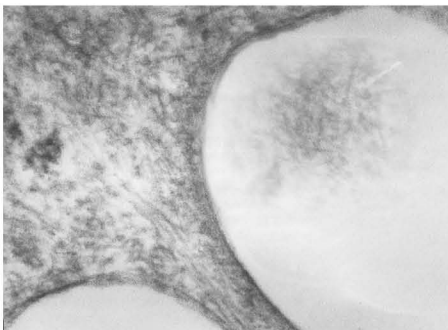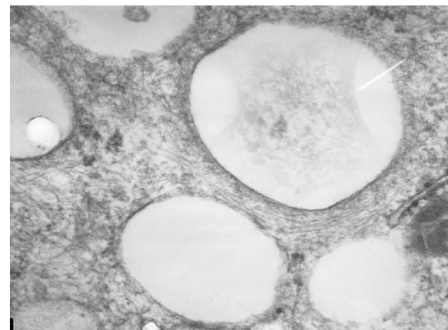

**D283**

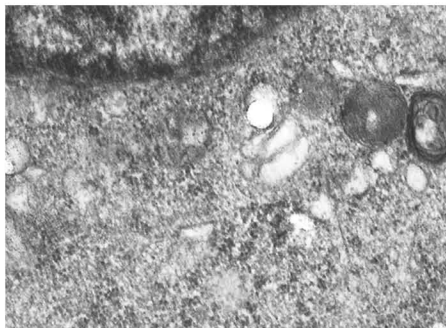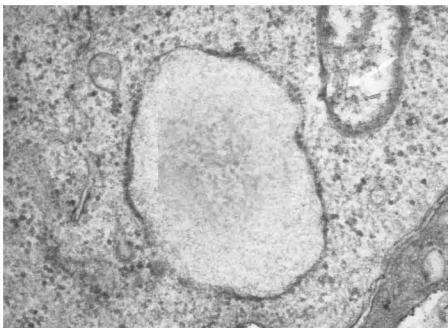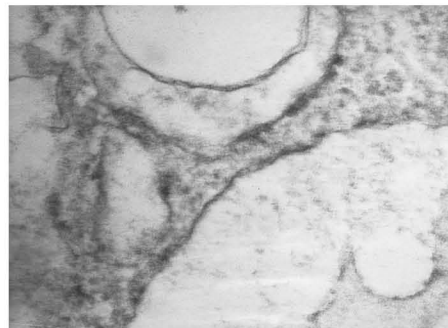

**SH-SY5Y**

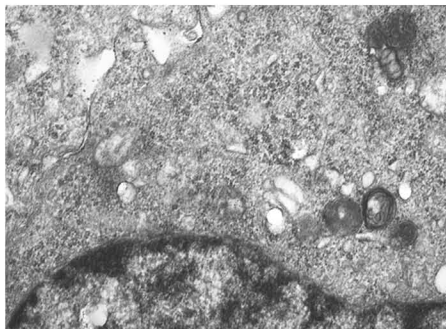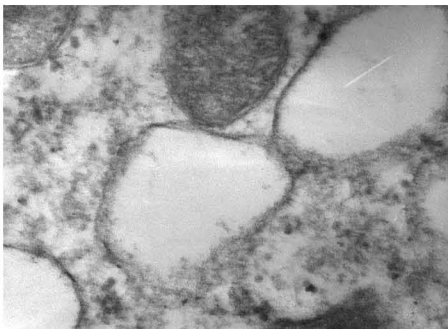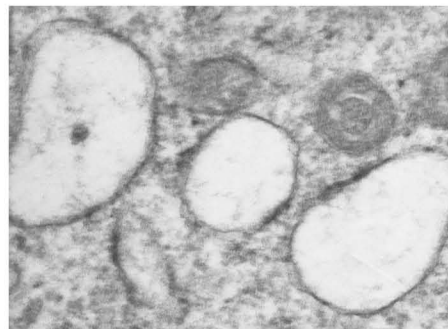

# Supplementary Figure 5

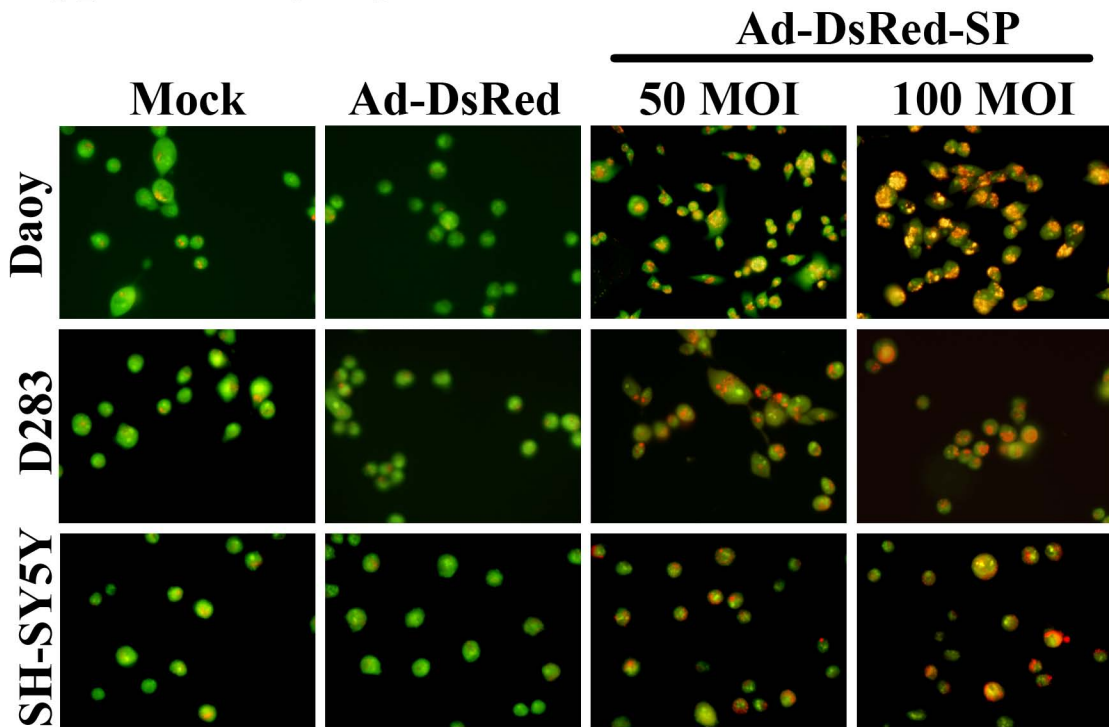

# Supplementary Figure 6

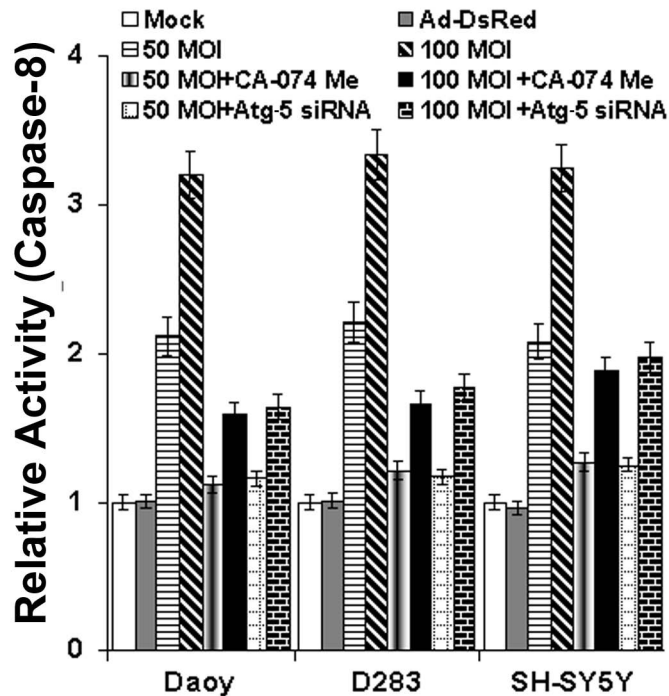

# Supplementary Figure 7

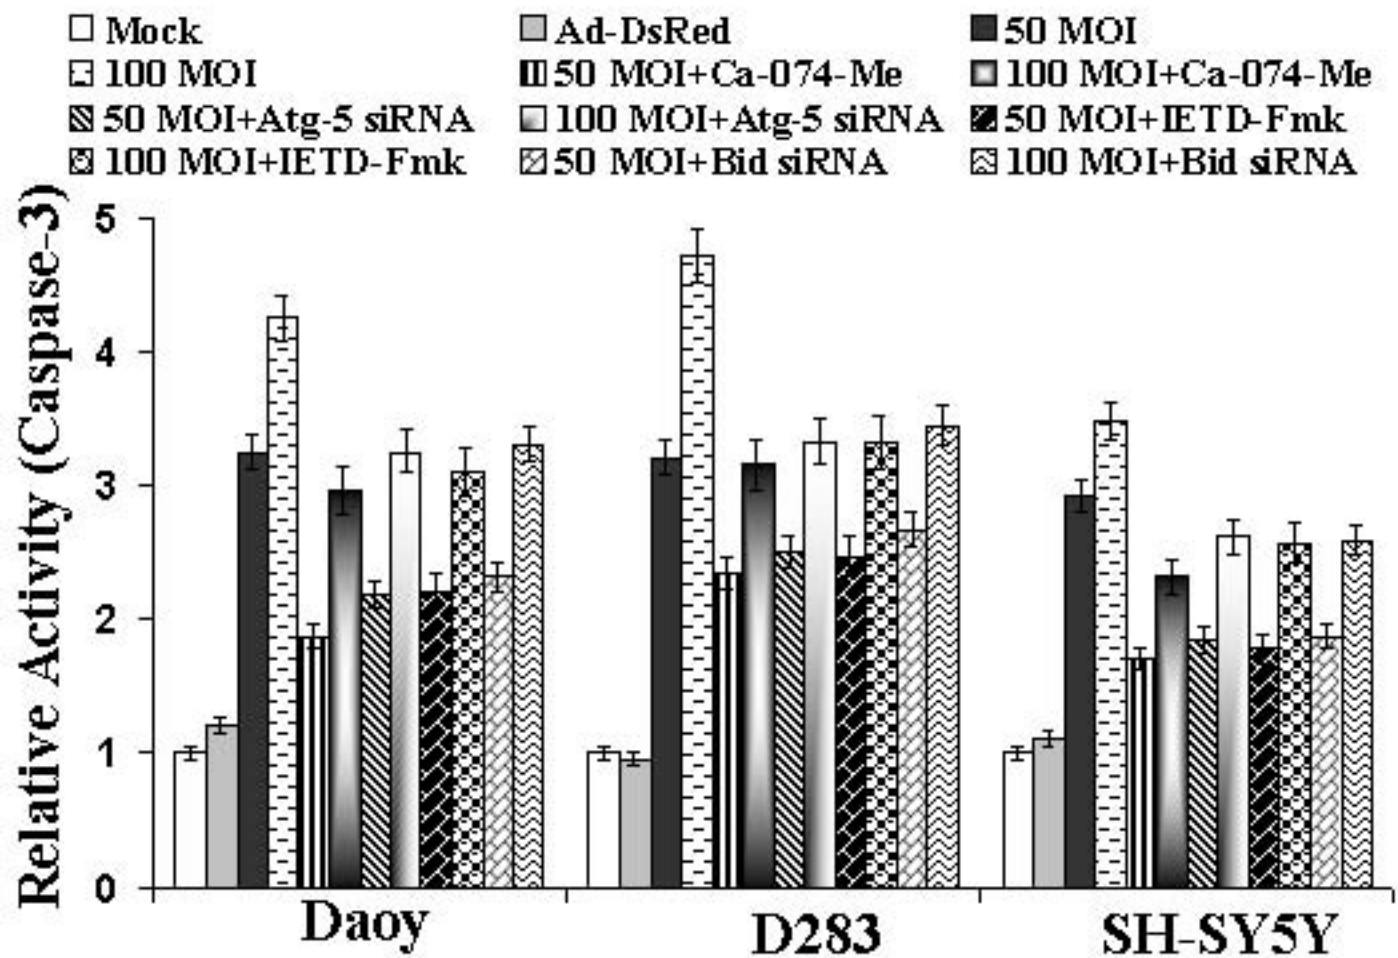

Supplementary Figure 8

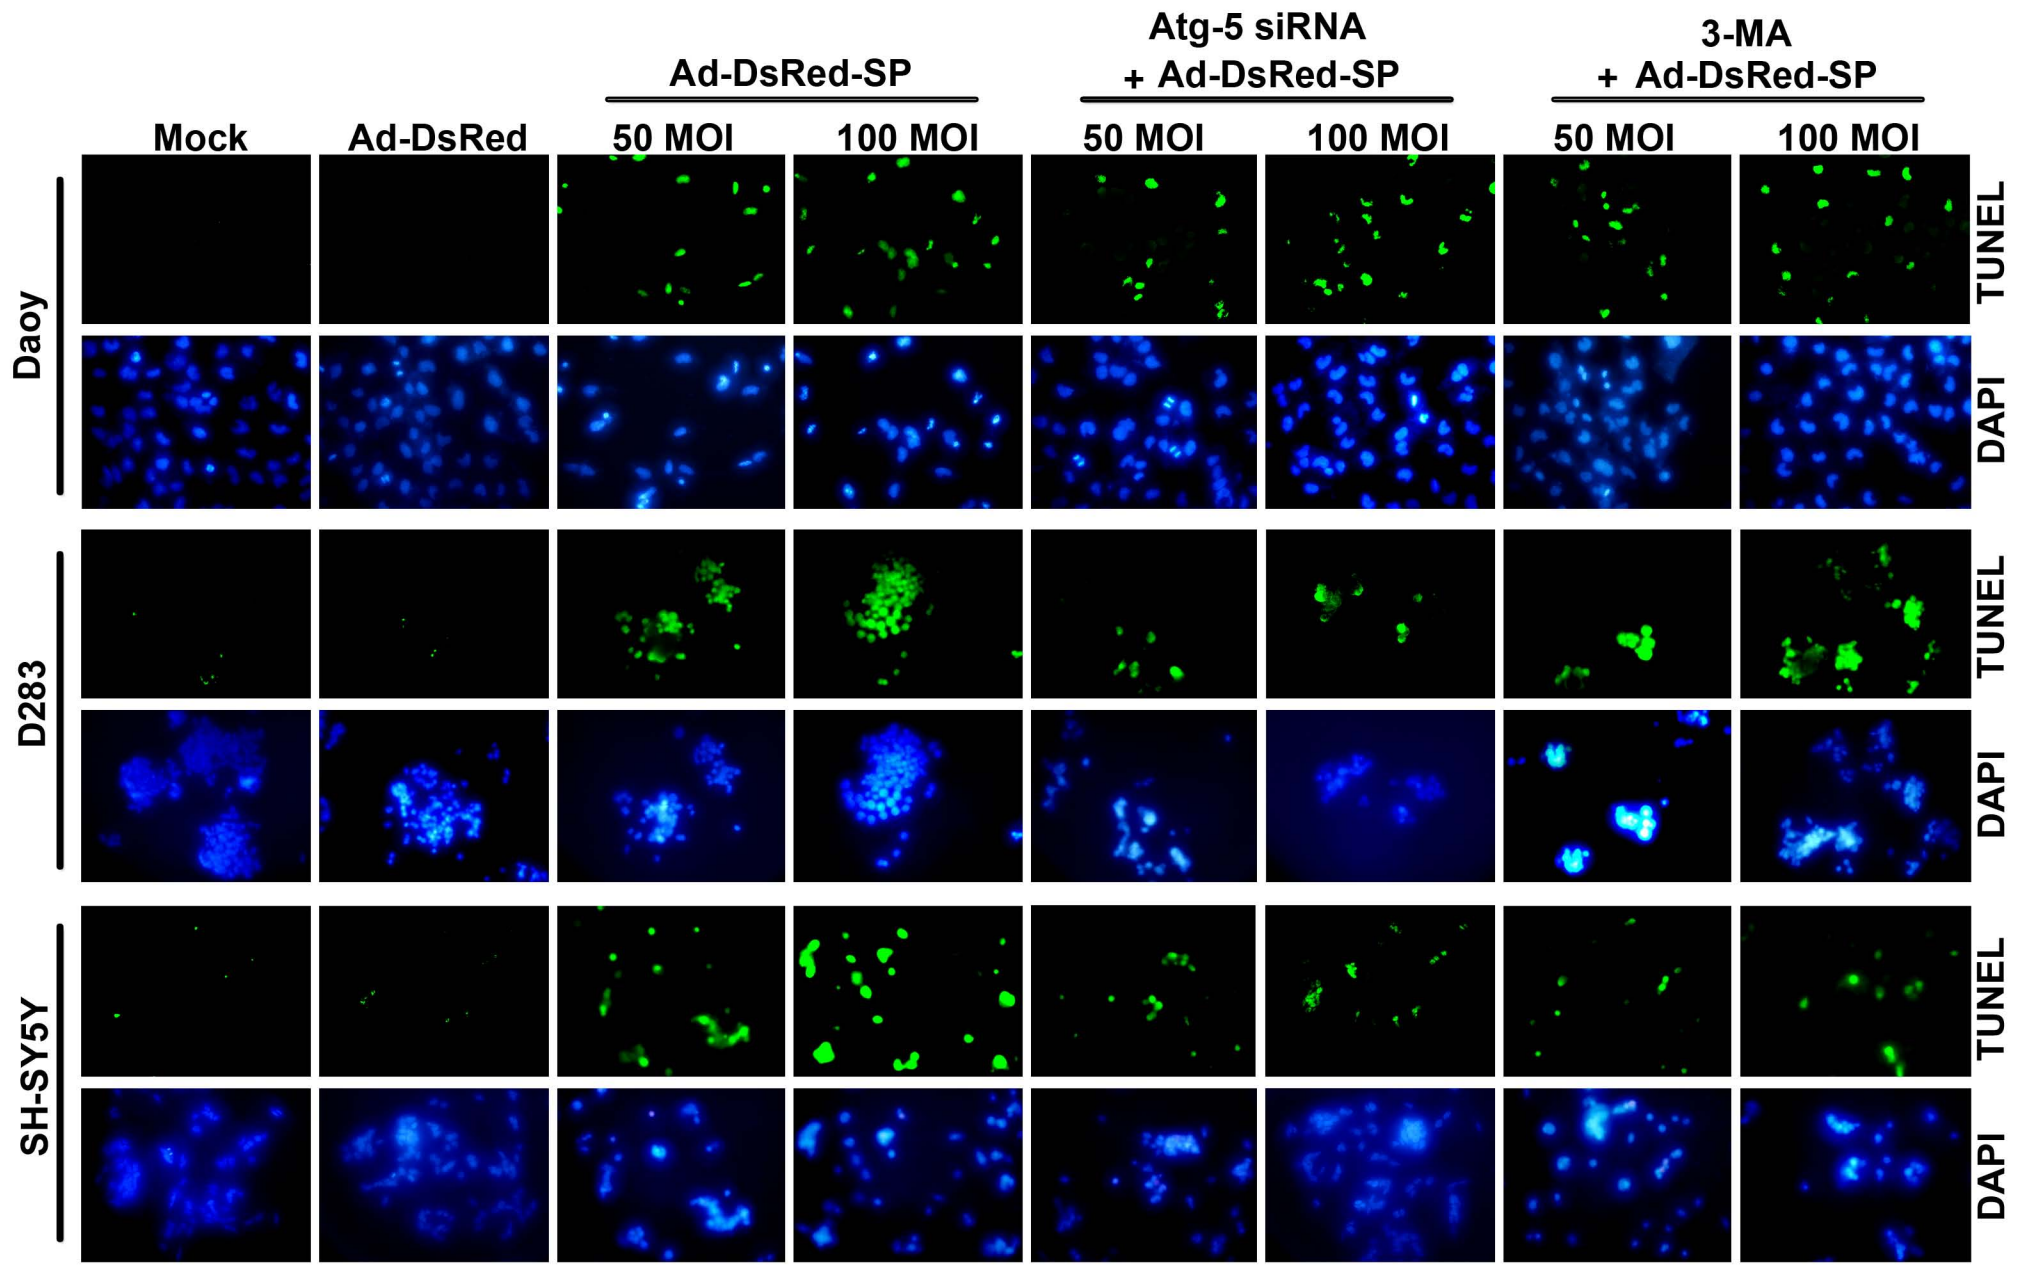



# Supplementary Figure 9

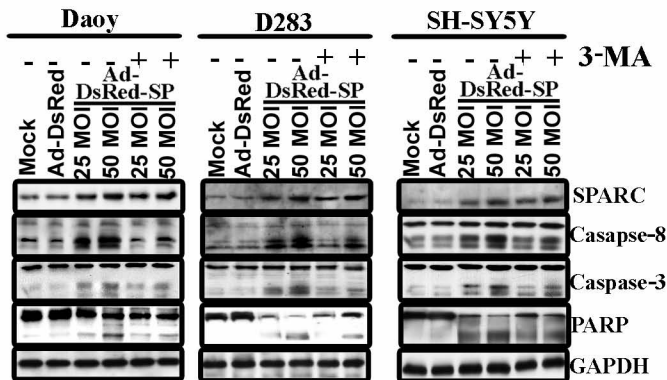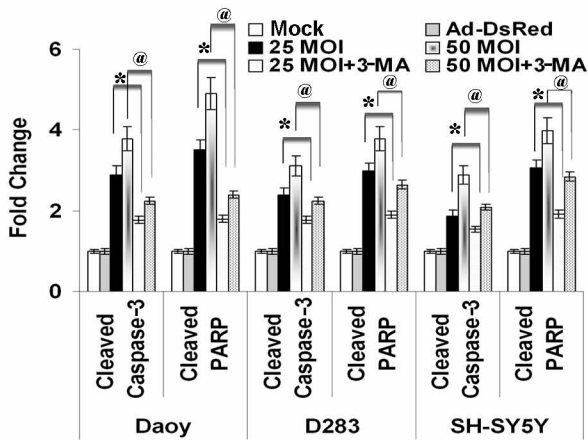

# Supplementary Figure 10

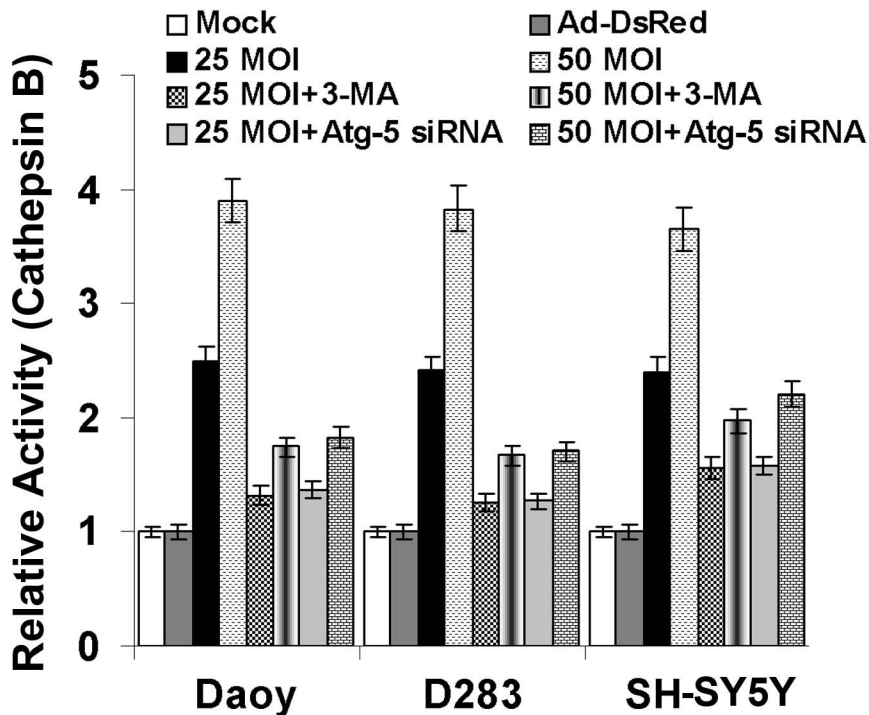

# Supplementary Figure 11

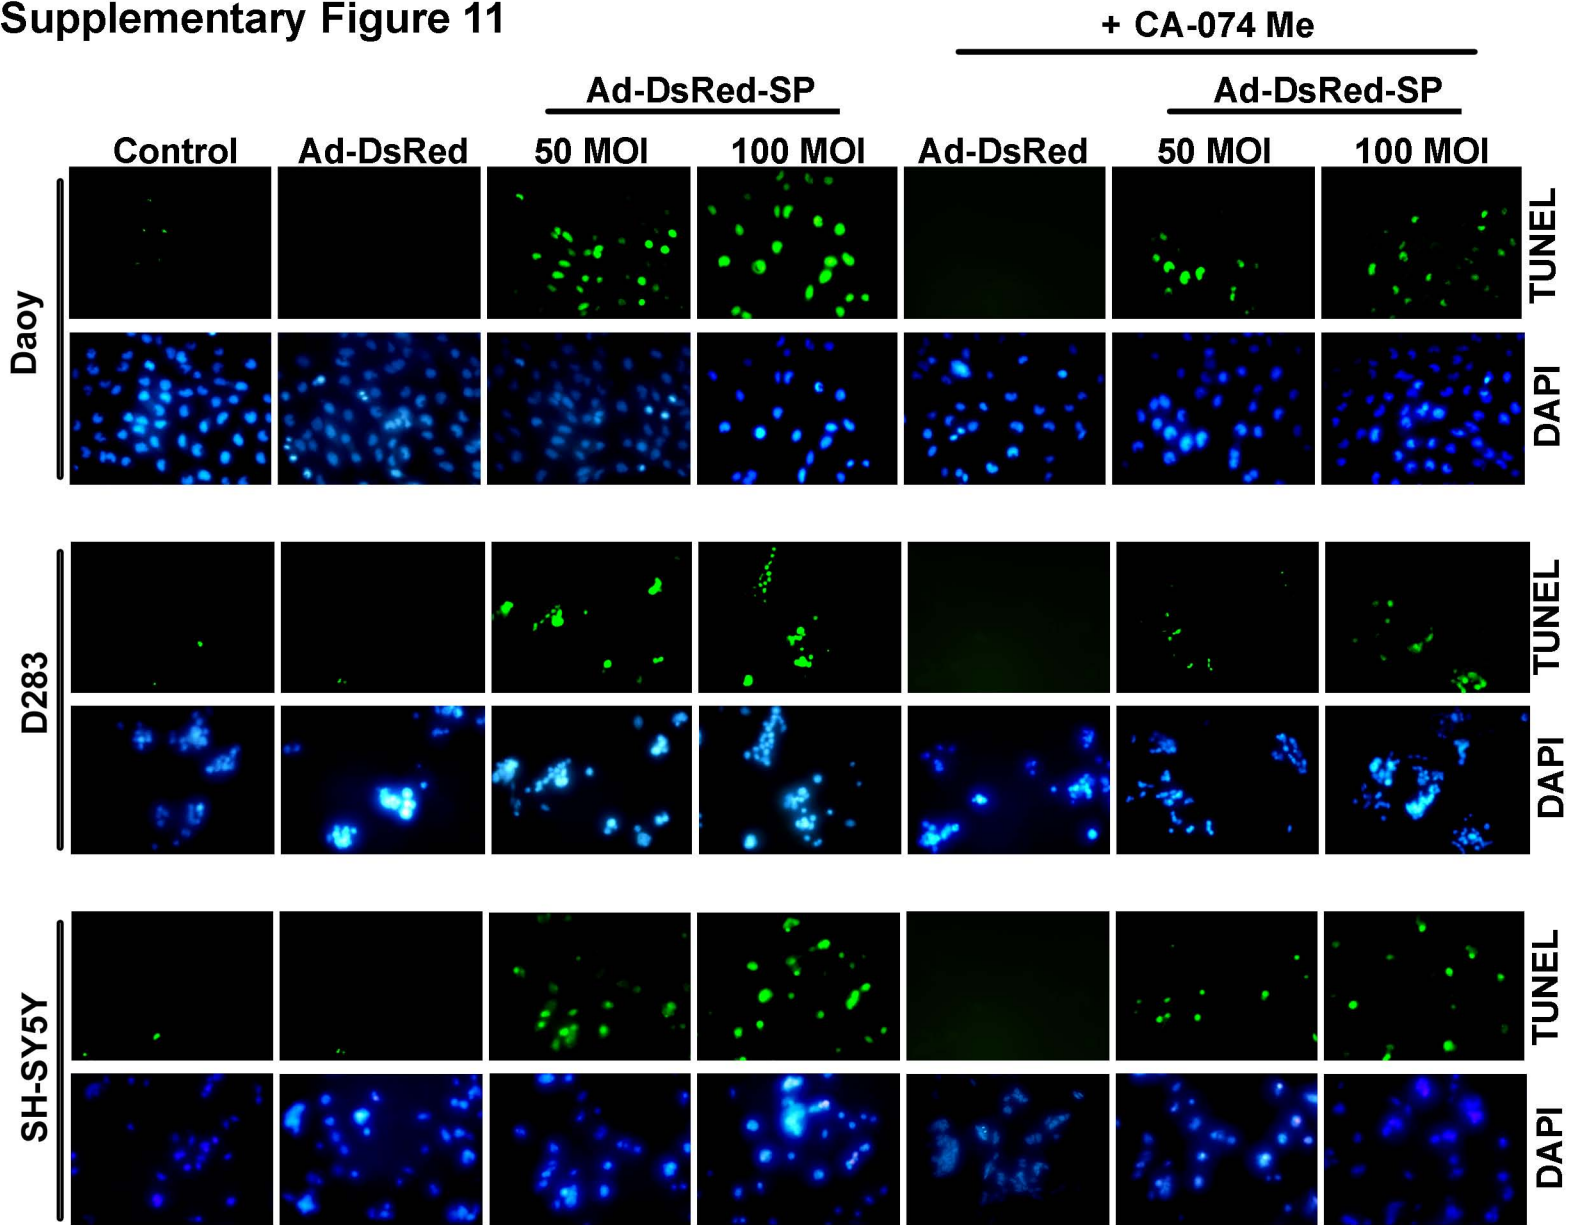

# Supplementary Figure 12

## Ad-DsRed (100 MOI)

mRFP-LC3

LAMP1

Merge

Daoy

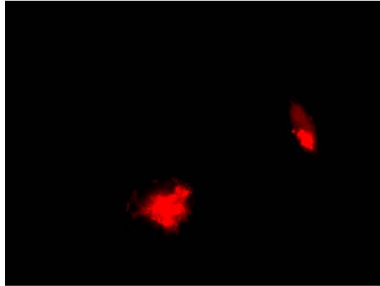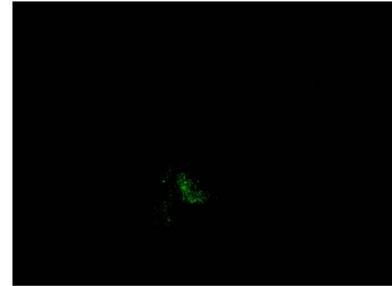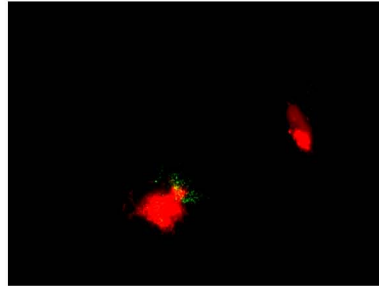

D283

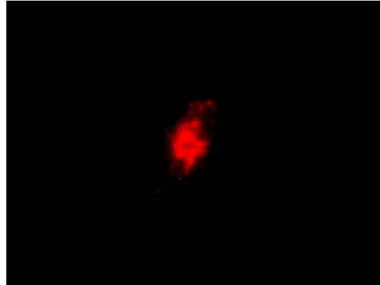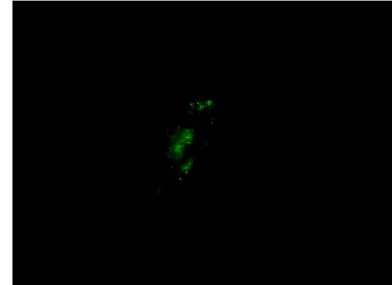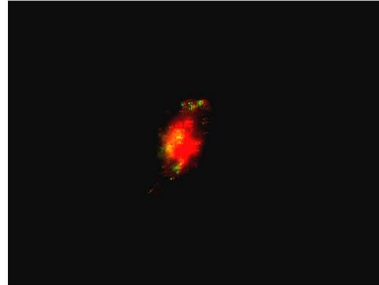

SH-SY5Y

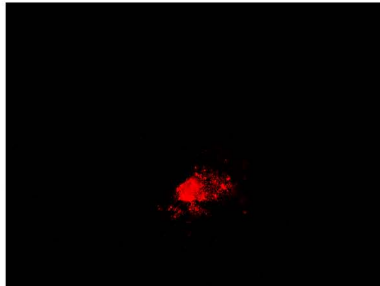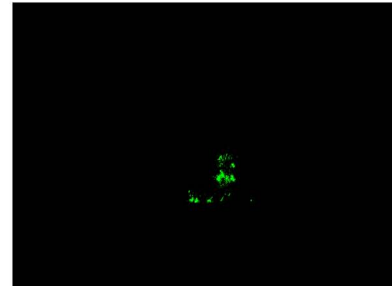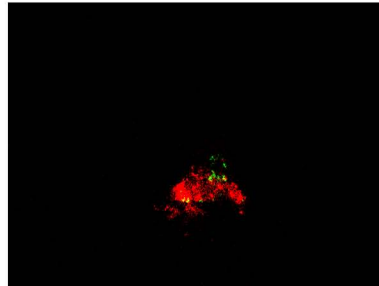

## Ad-DsRed-SP (100 MOI)

mRFP-LC3

LAMP1

Merge

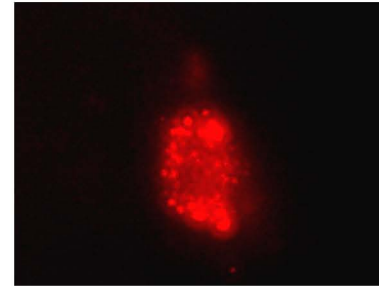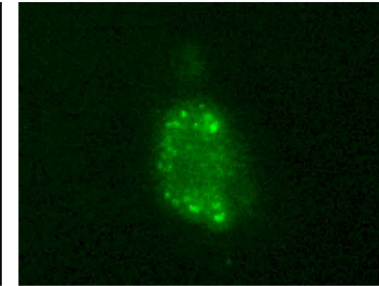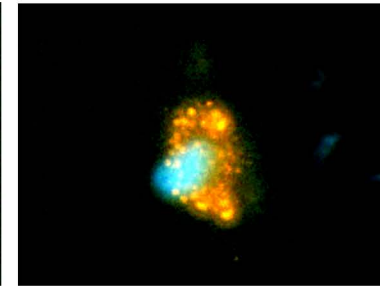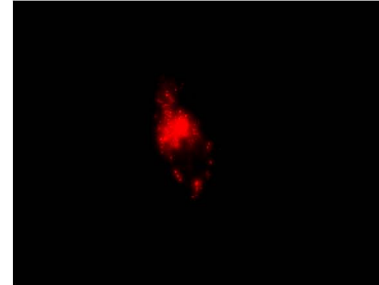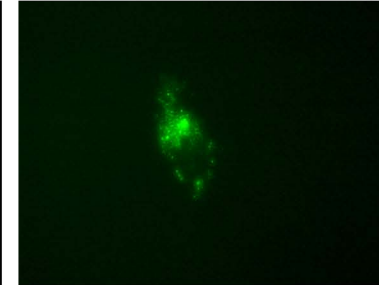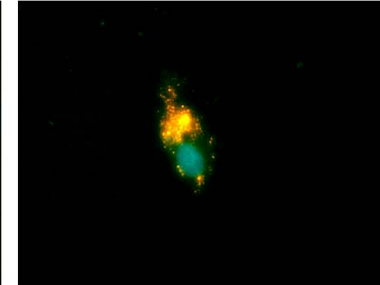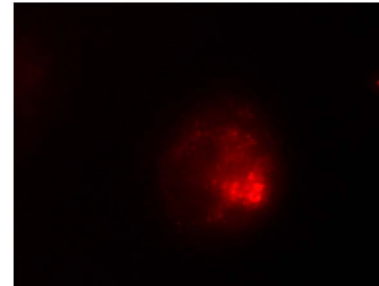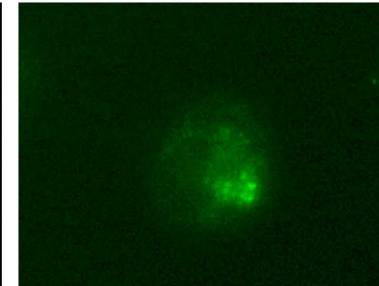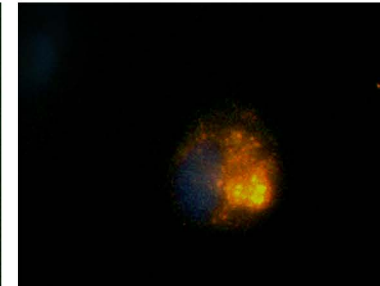

# Supplementary Figure 13

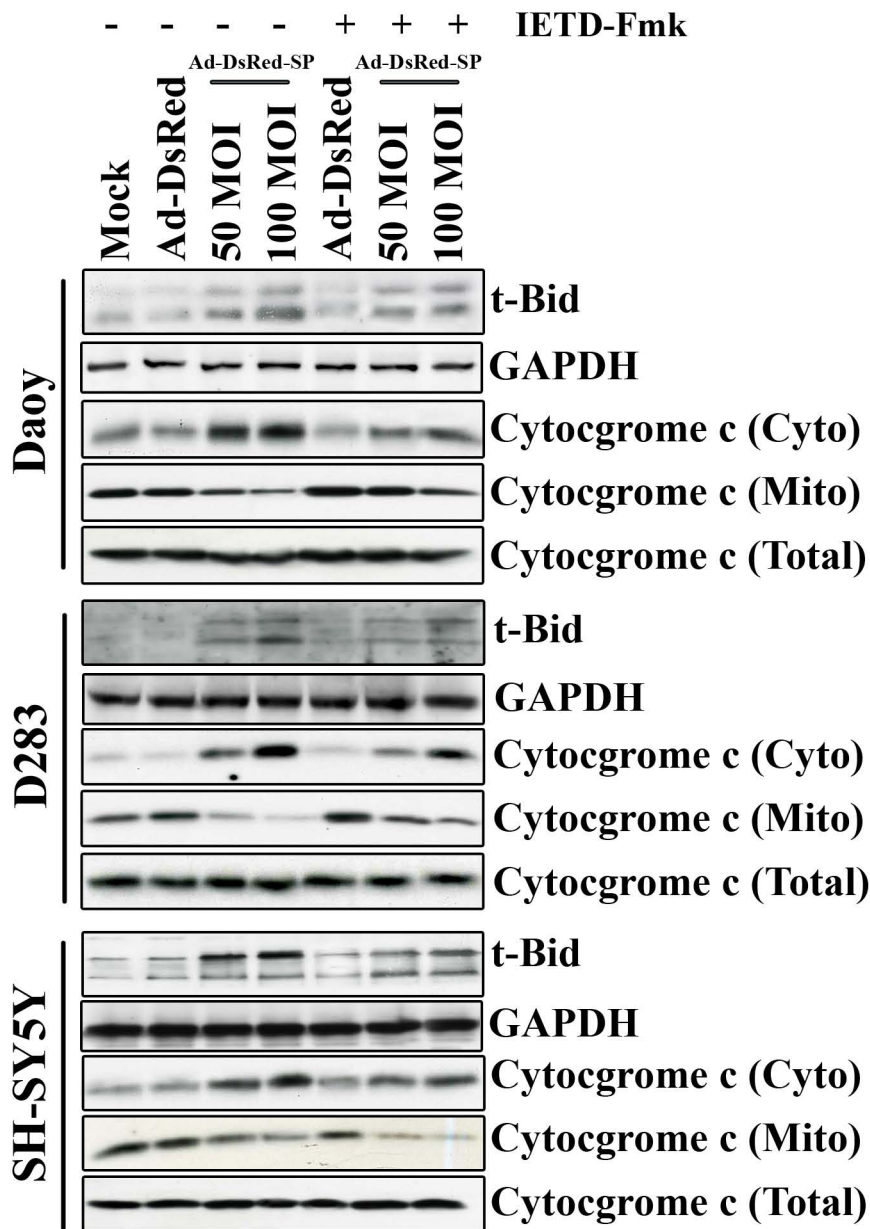

# Supplementary Figure 14

IETD-Fmk - - - - + +

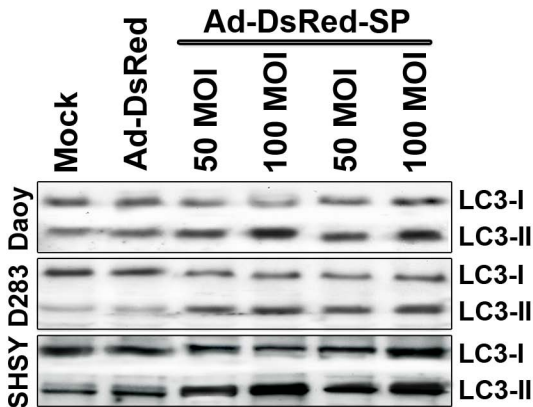

Supplement: NIHMS263402-supplement-1.pdf [file NIHMS263402-supplement-1.pdf]
